# Supplementary material for: High-sensitivity fluorescence imaging of iron in plant tissues
Source: Royal Society of Chemistry journal article supplement (doi:10.1039/c4cc02132k), 2014-01-01
Supplement: c4cc02132k1.pdf [file c4cc02132k1.pdf]

# High-sensitivity fluorescence imaging of iron in plant tissues

Mi-Jeong Park, Hak-Sung Jung, Young-Jae Kim, Young-Ju Kwon, Jin-Kyu Lee\* and Chung-Mo Park\*

*Department of Chemistry, Seoul National University, Seoul 151-747, Korea*

E-mail: jinkle@snu.ac.kr, Tel: +82-2-879-2923, Fax: +82-2-882-1080

*Plant Genomics and Breeding Institute, Seoul National University, Seoul 151-742, Korea*

E-mail: cmpark@snu.ac.kr, Tel: +82-2-880-6643, Fax: +82-2-886-6697

## [Contents]

|                                                                                                                   |         |
|-------------------------------------------------------------------------------------------------------------------|---------|
| Experimental procedures                                                                                           | S2-S4   |
| <sup>1</sup> H-NMR spectrum of MPNBD                                                                              | S4      |
| <sup>13</sup> C-NMR spectrum of MPNBD                                                                             | S5      |
| Mass analysis of MPNBD                                                                                            | S6      |
| Comparison of fluorescence responses of MPNBD in water and ethanol<br>to various amounts of Fe <sup>3+</sup>      | S7      |
| Absorption spectra of MPNBD in the presence of different metal ions                                               | S8-S9   |
| Fluorescence responses of MPNBD to various metal ions                                                             | S10-S12 |
| Calibration curve of MPNBD-Fe <sup>3+</sup> in ethanol solution                                                   | S13     |
| Fluorescence response of MPNBD to various metal ions and<br>to mixtures of Fe <sup>3+</sup> and other metal ions. | S14     |
| Images of MPNBD-treated plants                                                                                    | S15     |
| Stability of MPNBD fluorescent probe                                                                              | S16     |
| Effects of various metal ions on the MPNBD imaging of iron in plants                                              | S17     |
| Procedures of different iron detection methods in plants                                                          | S18     |
| References                                                                                                        | S19     |

## Experimental procedures

**Synthesis of 7-(4-methylpiperazin-1-yl)-4-nitrobenzo-2-oxa-1,3-diazole (MPNBD)** MPNBD was prepared following the procedure that has been described previously,<sup>1</sup> but with some modifications. 4-chloro-7-nitrobenzofurazan (0.5 g, 2.5 mmol) was dissolved in  $\text{CHCl}_3$  (20 mL). 1-methylpiperazine (0.28 mL, 2.5 mmol) was added and stirred for 30 min at room temperature. The reaction mixture was concentrated on a rotary evaporator. The residue was purified by column chromatography ( $\text{SiO}_2$ , eluent:  $\text{CH}_2\text{Cl}_2/\text{MeOH} = 10/1$ ) to afford 0.43 g of orange powder in 66% yield.  $^1\text{H}$ - and  $^{13}\text{C}$ -NMR spectra were measured on a Varian NMR System 500 MHz NMR Spectrometer (Varian, Palo Alto, CA). Data were acquired as follows; chemical shifts in ppm from tetramethylsilane as an internal standard in  $\text{CDCl}_3$ , integration, multiplicity (s = singlet, d = doublet, t = triplet).  $^1\text{H}$ -NMR (500 MHz,  $\text{CDCl}_3$ ):  $\delta$  ppm 2.32 (s, 3H), 2.61 (t, 4H), 4.06 (t, 4H), 6.25 (d, 1H), 8.35(d, 1H).  $^{13}\text{C}$ -NMR (500 MHz,  $\text{CDCl}_3$ ):  $\delta$  ppm 145.18, 144.83, 144.78, 135.10, 123.54, 102.42, 54.55, 49.35, 45.84. HR-MS(FAB+) calculated for 264.1097 m/z, observed for 264.1097 m/z

**Metal ion sensing by MPNBD** A stock solution of MPNBD (14.81  $\mu\text{M}$ ) and metal solutions of  $\text{FeCl}_3 \cdot 6\text{H}_2\text{O}$  (4.51 mM),  $\text{FeCl}_2 \cdot 4\text{H}_2\text{O}$  (5.90 mM),  $\text{CuCl}_2 \cdot 2\text{H}_2\text{O}$  (7.10 mM),  $\text{CrCl}_3 \cdot 6\text{H}_2\text{O}$  (4.24 mM),  $\text{CaCl}_2$  (6.53 mM),  $\text{MgCl}_2 \cdot 6\text{H}_2\text{O}$  (6.70 mM),  $\text{MnCl}_2 \cdot 4\text{H}_2\text{O}$  (3.48 mM),  $\text{NiCl}_2$  (4.65 mM), and  $\text{ZnCl}_2$  (4.81 mM) were prepared in ethanol. Metal solutions of KCl (4.60 mM) and NaCl (6.55 mM) were prepared in water. Two ml of the MPNBD stock solution and each of metal ion stock solutions were mixed. Ethanol was then added to each mixture to match the concentration of MPNBD in each mixture to 9.88  $\mu\text{M}$ . The mixtures were analyzed by UV-Vis spectroscopy (Sinco, S-3100, Seoul, Korea) and fluorophotometry (JASCO, FP-6500, Tokyo, Japan) at room temperature. Light source for fluorophotometry was the 150W Xenon lamp with a diffraction grating to select the excitation light. The emission spectra were measured in the wavelength range from 490 to 750 nm under the excitation at 470 nm.

**Plant materials and growth conditions** *Arabidopsis thaliana* ecotype Columbia-0 (Col-0) was used. The *Arabidopsis* plants were grown on 1/2 X Murashige & Skoog (MS) media containing 0.6% (w/v) agar (hereafter referred to as MS-agar plate) in growth chamber at 22°C with white light illumination ( $120 \mu\text{mol photons m}^{-2}\text{s}^{-1}$ ) provided by fluorescent FLR40D/A tubes (Osram, Seoul, Korea) under long day conditions (16-hour light and 8-hour dark).

**Staining of iron in *Arabidopsis* plants** Four-day-old *Arabidopsis* plants grown on MS-agar plates were used. The Perls and Perls/DAB (3,3'-diaminobenzidine) staining procedures were conducted as described previously.<sup>2,3</sup> For the Perls staining, plants were vacuum infiltrated with a solution containing equal volumes of 4% (v/v) HCl and 4% (w/v)  $\text{K}_4\text{Fe}(\text{CN})_6$  for 15 minutes and subsequently incubated for 30 minutes in complete darkness at room temperature. For the DAB-intensified Perls staining, the Perls-stained plants were washed with distilled water, incubated in a methanol solution containing 0.01 M  $\text{NaN}_3$  and 0.3% (v/v)  $\text{H}_2\text{O}_2$  for 1 hour, and then washed with 0.1 M phosphate buffer (pH 7.4). For the DAB intensification, the plants were incubated for 10 to 30 minutes in 0.1 M phosphate buffer (pH 7.4) containing 0.0025% (w/v) DAB, 0.005% (v/v)  $\text{H}_2\text{O}_2$ , and 0.005% (w/v)  $\text{CoCl}_2 \cdot 6\text{H}_2\text{O}$ .

For fluorescence imaging of iron with MPNBD, four-day-old *Arabidopsis* plants were briefly washed with ethanol and vacuum infiltrated with a ethanol solution containing 50  $\mu\text{M}$  MPNBD for 5 minutes. The plants were incubated in complete darkness for 10 minutes and washed with ethanol before fluorescence microscopy.

**Fluorescence microscopy** Plants stained by the Perls and Perls/DAB methods were analyzed using the Olympus BX51 microscope (Olympus, Tokyo, Japan). Images were acquired using the Olympus DP70 digital camera system and processed with the DPController and DP Manager softwares (Olympus). For fluorescence detection in the MPNBD-treated plants, the U-MWB2 fluorescence detection system (excitation filter BP460-490, dichronic mirror DM500, and barrier filter BA520IF) (Olympus) was used. Light was provided by a 100W High Pressure Mercury Burner (Olympus, BH2-RFL-T3). Fluorescence

images were taken with an exposure time of 250 ms at 40X magnification. High-magnification images were visualized using the Zeiss LSM510 confocal microscope (Carl Zeiss, Jena, Germany) with the following filter setup: excitation 488 nm, emission BP510-530 nm. Fluorescence images were analyzed using the ImageJ software (<http://rsbweb.nih.gov/ij/>), as described previously.<sup>2,3</sup>

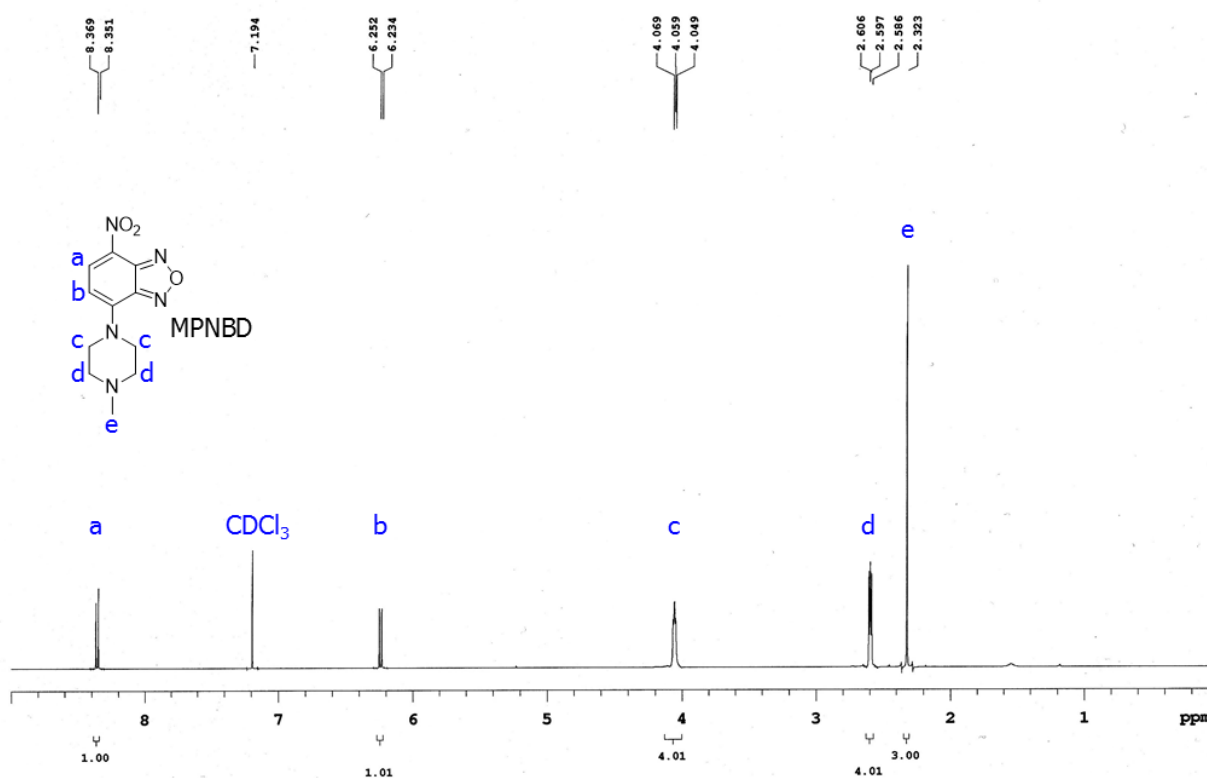

**Figure S1.** <sup>1</sup>H-NMR spectrum of MPNBD.

The spectrum were measured by the 500 MHz Varian NMR System (Varian, Palo Alto, CA) in CDCl<sub>3</sub>, showing appropriate peaks consistent with the previously reported results in Ref 10 (Xiao and Qian, 2003). The integrated areas under the signal are reasonably proportional to the number of hydrogen atoms at each position; a : b : c : d : e = 1 : 1 : 4 : 4 : 3.

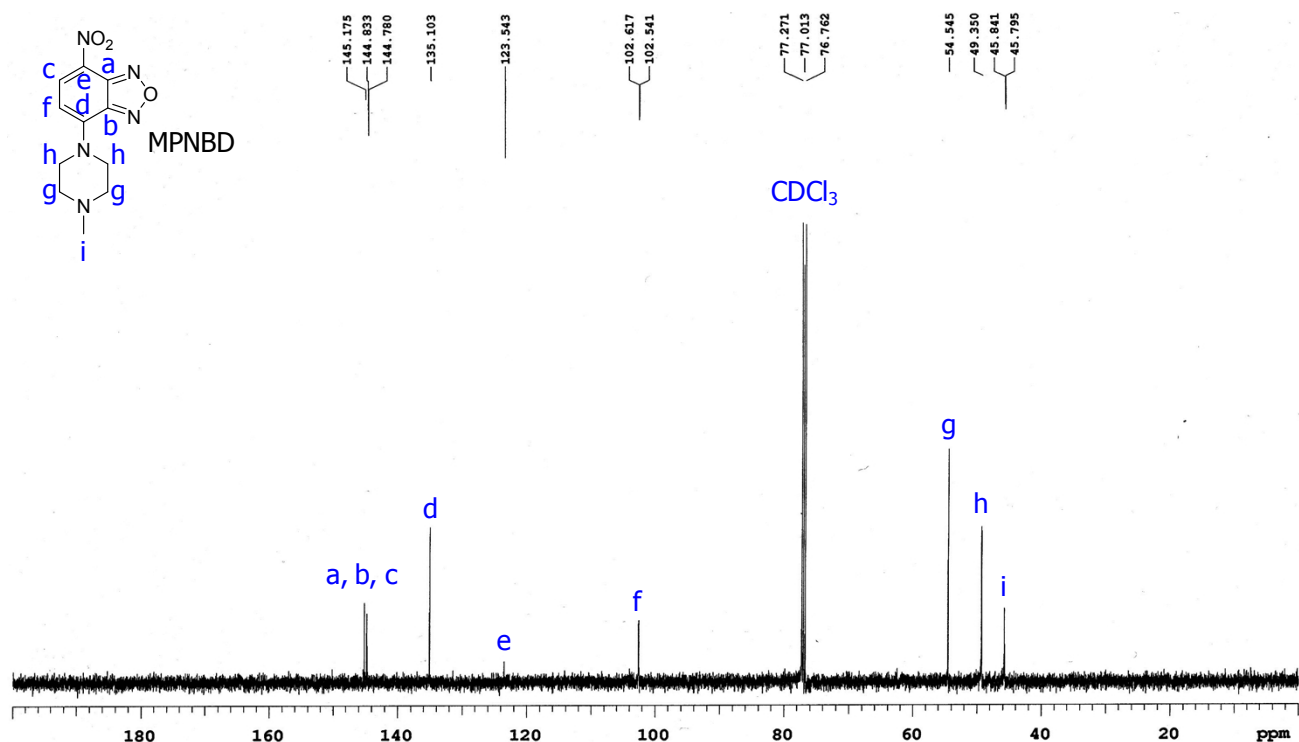

**Figure S2.**  $^{13}\text{C}$ -NMR spectrum of MPNBD.

The spectrum were measured by the 500 MHz Varian NMR System in  $\text{CDCl}_3$ , exhibiting appropriate peaks (9 peaks) consistent with the previously reported results in Ref 10 (Xiao and Qian, 2003). The numbers at the peaks in the spectra indicate the numbers of different chemical environments where carbon atoms are located in the molecule (designated as a to i in the inset). Note that the peak intensity (or integrated area that is not shown in the spectra) is not simply proportional to the number of carbon atoms that gives rise to the signal because the nuclear overhauser effects from proton decoupling are not equal for all the carbons.

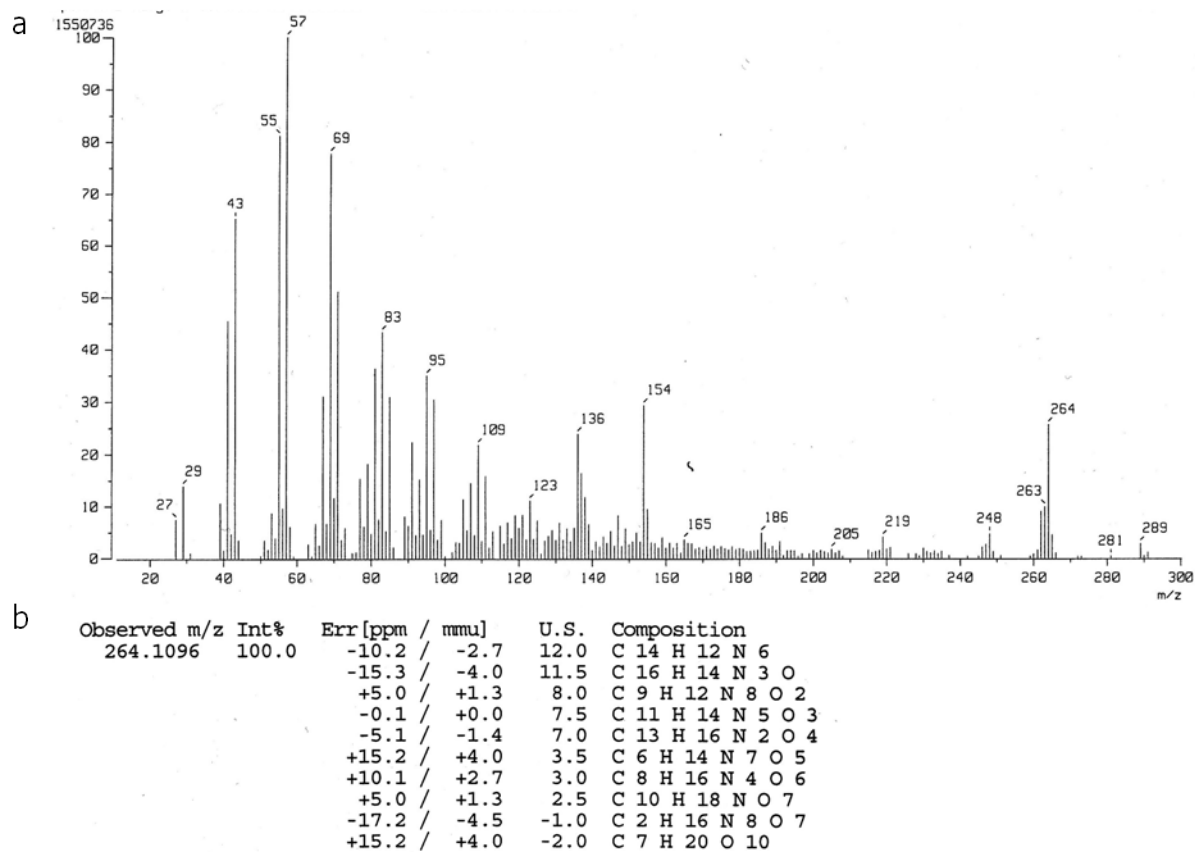

**Figure S3.** Mass analysis of MPNBD.

(a) Fast atom bombardment-mass spectrometry (FAB-MS). (b) High resolution-mass spectrum (HR-MS) result of MPNBD. The mass of MBNBD was calculated for  $C_{11}H_{14}N_5O_3$ : 264.1096 and observed: 264.1096 by GC-MS using the JMS-700 MStation (JOEL, Tokyo, Japan).

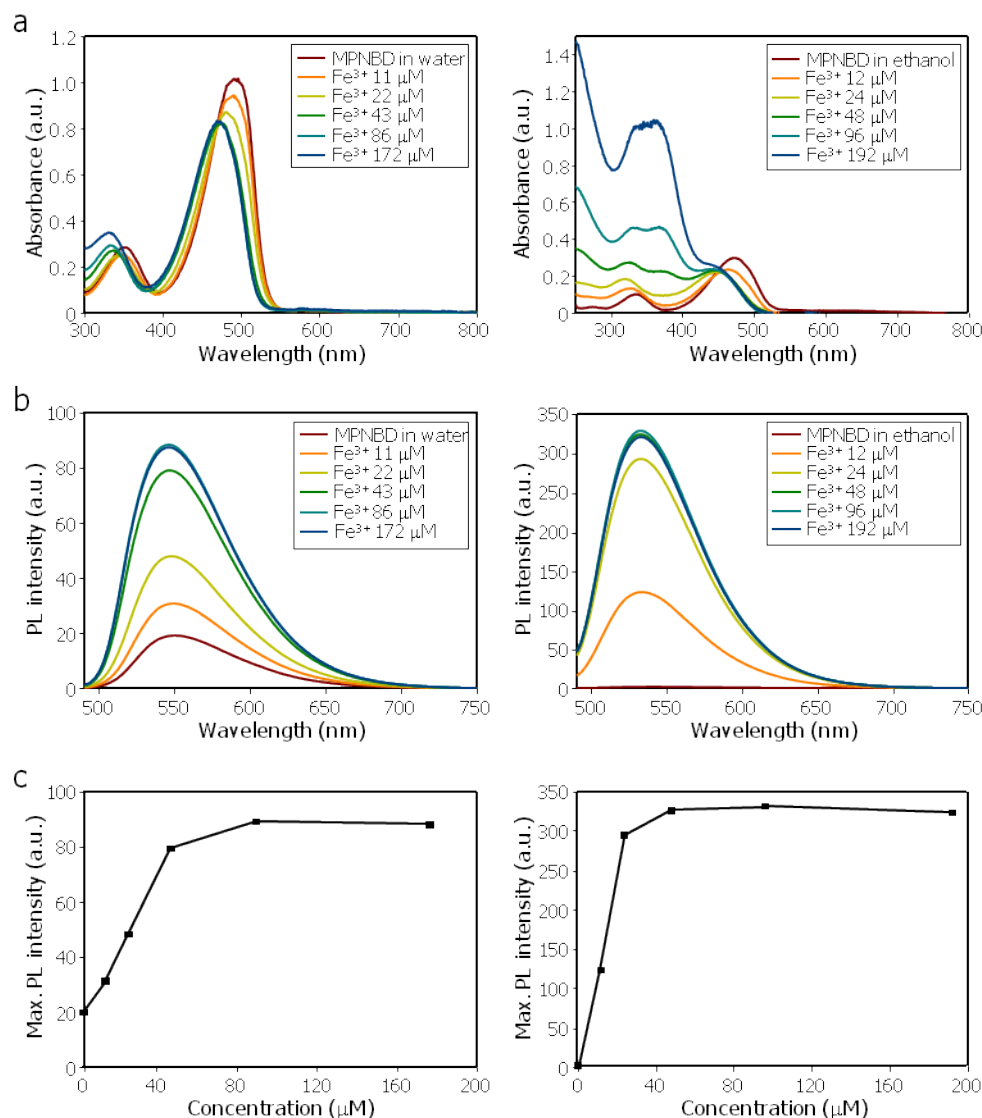

**Figure S4.** Comparison of fluorescence responses of MPNBD in water (42.2  $\mu\text{M}$ ) and ethanol (11.8  $\mu\text{M}$ ) to various amounts of  $\text{Fe}^{3+}$ .

(a) Changes in absorption spectra of MPNBD upon gradual addition of  $\text{Fe}^{3+}$  in water (left) and ethanol (right). (b) Changes in fluorescence spectra of MPNBD upon gradual addition of  $\text{Fe}^{3+}$  in water (left) and ethanol (right) under irradiation at 470 nm. (c) Fluorescence responses of MPNBD to different concentrations of  $\text{Fe}^{3+}$  in water (left) and ethanol (right). The excitation wavelength was 470 nm and the monitored maximum photoluminescence (PL) emission wavelengths were 548 nm (in water) and 533 nm (in ethanol), respectively, which are clearly shown in (b). a.u., arbitrary unit.

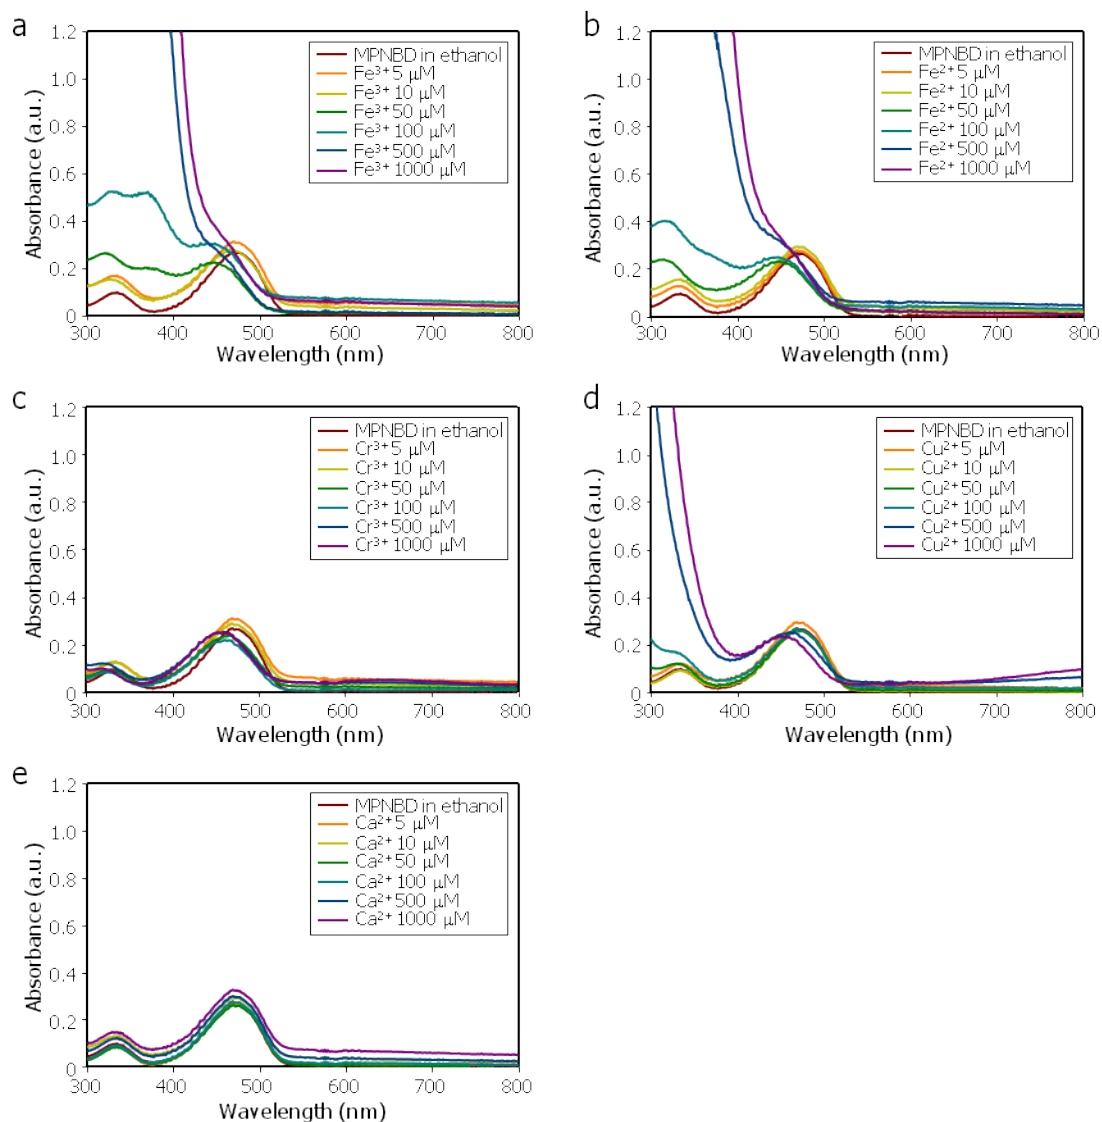

**Figure S5.** Absorption spectra of MPNBD (9.88  $\mu\text{M}$ ) in the presence of  $\text{Fe}^{3+}$ ,  $\text{Fe}^{2+}$ ,  $\text{Cr}^{3+}$ ,  $\text{Cu}^{2+}$ , and  $\text{Ca}^{2+}$ .

Changes of absorption spectra of MPNBD upon gradual addition (0 to 1000  $\mu\text{M}$ ) of  $\text{Fe}^{3+}$ (a),  $\text{Fe}^{2+}$ (b),

$\text{Cr}^{3+}$ (c),  $\text{Cu}^{2+}$ (d), and  $\text{Ca}^{2+}$ (e) in ethanol were examined. a.u., arbitrary unit.



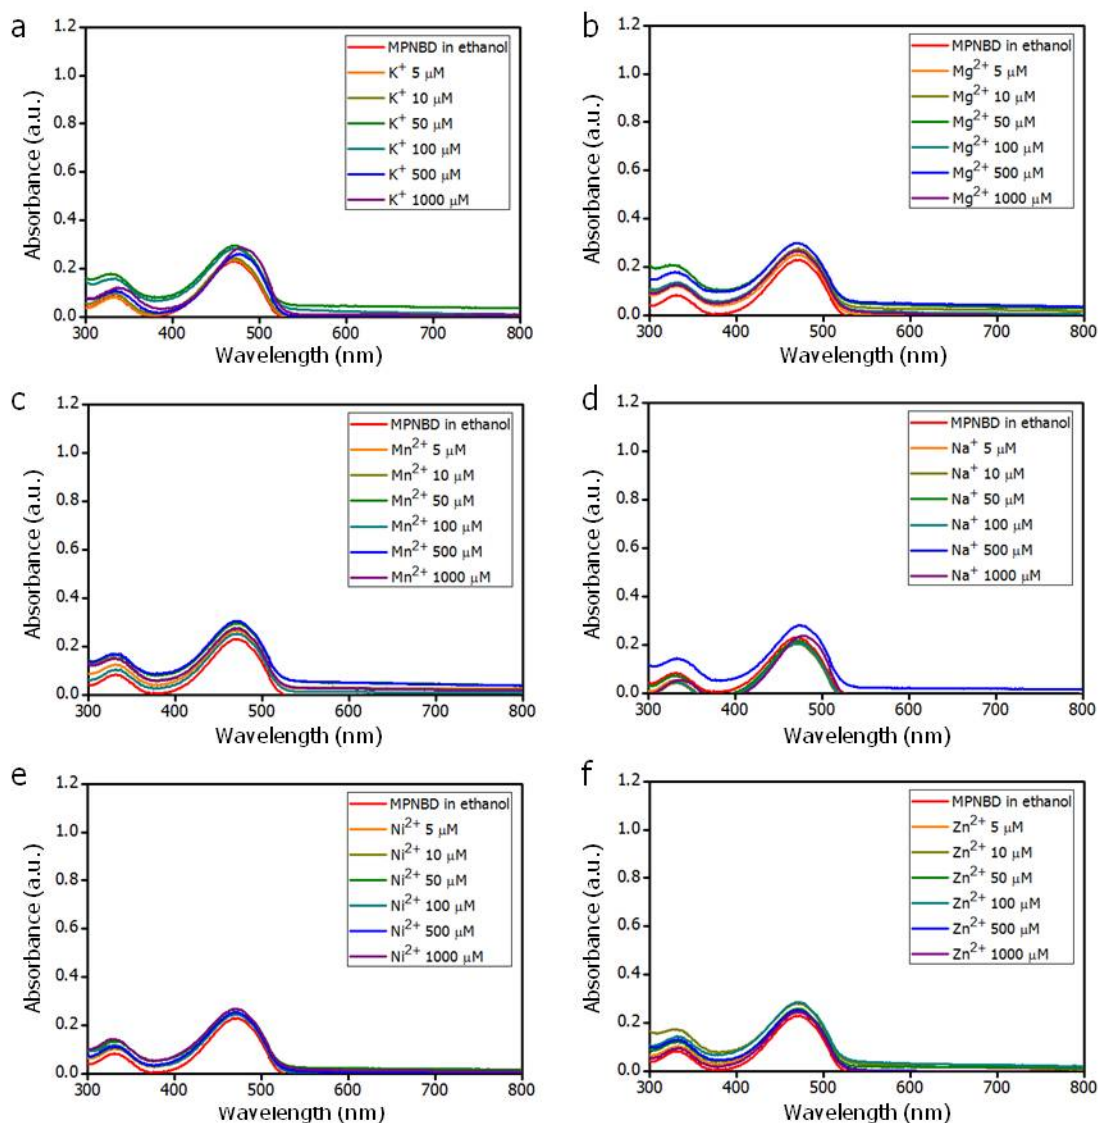

**Figure S6.** Absorption spectra of MPNBD (9.88  $\mu\text{M}$ ) in the presence of  $\text{K}^+$ ,  $\text{Mg}^{2+}$ ,  $\text{Mn}^{2+}$ ,  $\text{Na}^+$ ,  $\text{Ni}^{2+}$ , and  $\text{Zn}^{2+}$ .

Changes of absorption spectra of MPNBD upon gradual addition (0 to 1000  $\mu\text{M}$ ) of  $\text{K}^+$  (a),  $\text{Mg}^{2+}$  (b),  $\text{Mn}^{2+}$  (c),  $\text{Na}^+$  (d),  $\text{Ni}^{2+}$  (e),  $\text{Zn}^{2+}$  (f) in ethanol were examined. a.u., arbitrary unit.

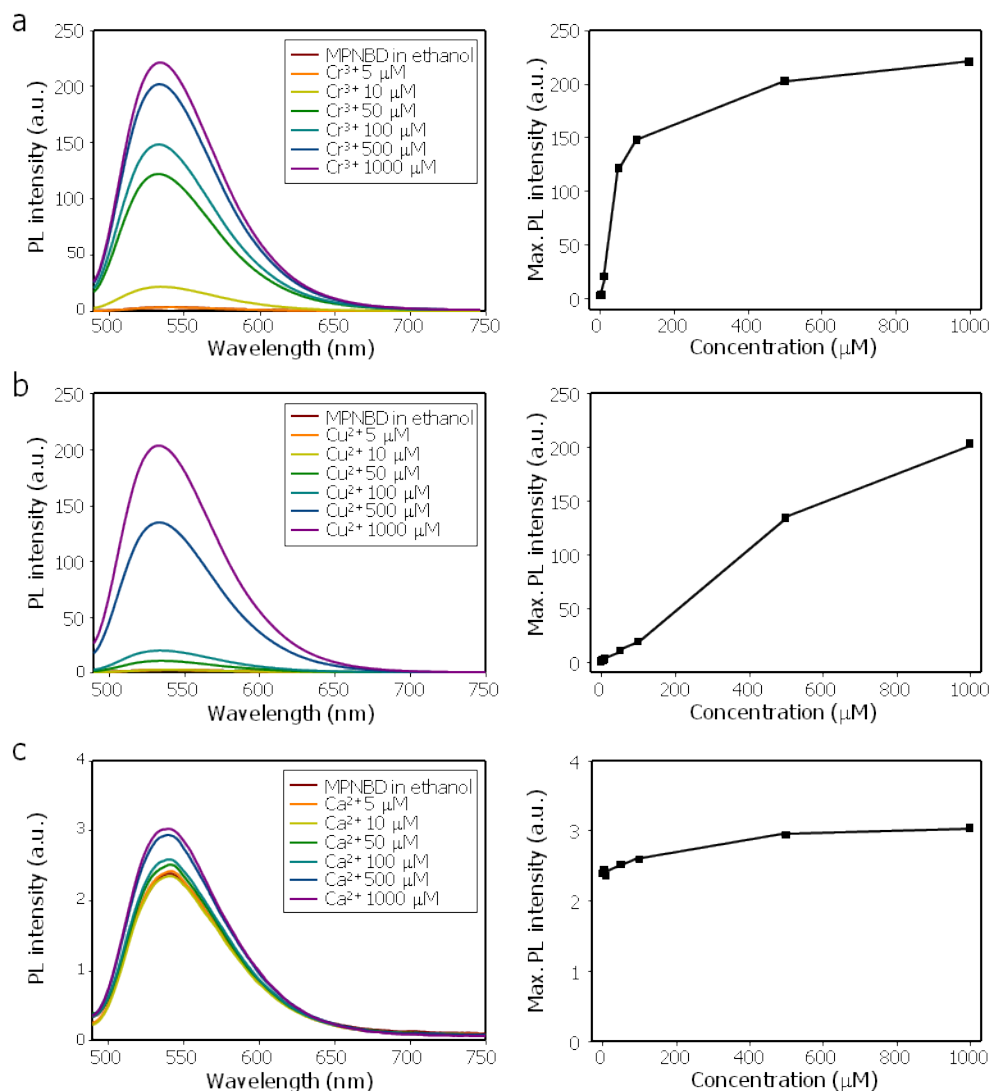

**Figure S7.** Fluorescence responses of MPNBD to Cr<sup>3+</sup>, Cu<sup>2+</sup>, and Ca<sup>2+</sup>.

Changes of fluorescence spectra and maximum emission intensity of MPNBD upon addition (0 to 1000 μM) of Cr<sup>3+</sup>(a), Cu<sup>2+</sup>(b) and Ca<sup>2+</sup>(c) in ethanol were examined. The excitation wavelength was 470 nm and the monitored maximum photoluminescence (PL) emission wavelengths were 534 nm (Cr<sup>3+</sup>, Cu<sup>2+</sup>) and 540 nm (Ca<sup>2+</sup>), respectively. a.u., arbitrary unit.

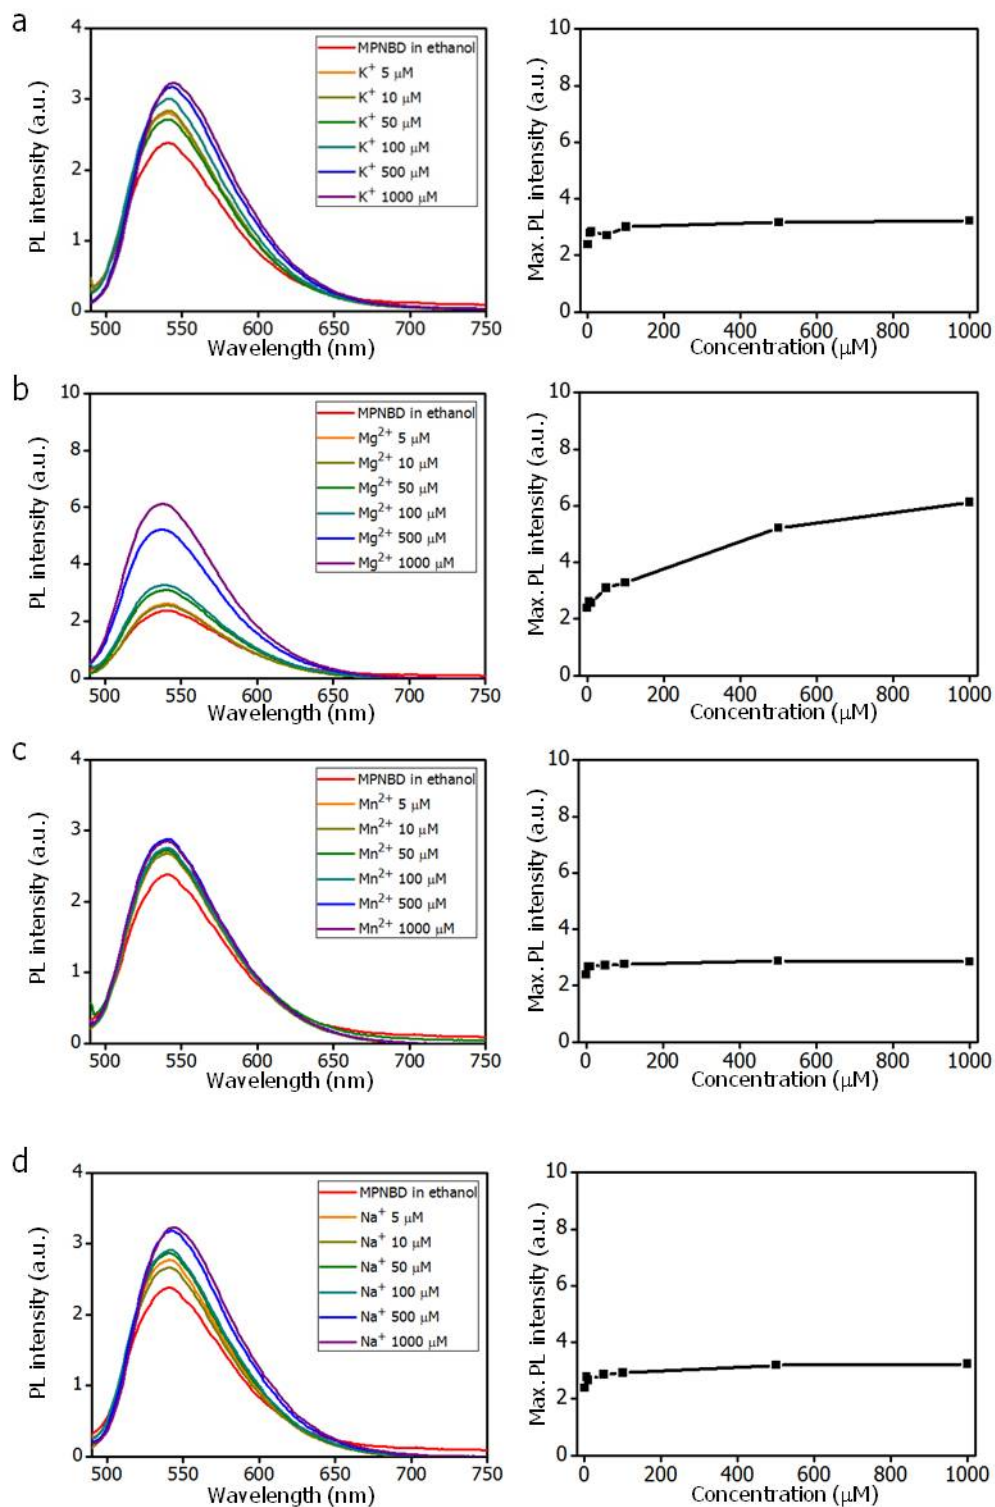

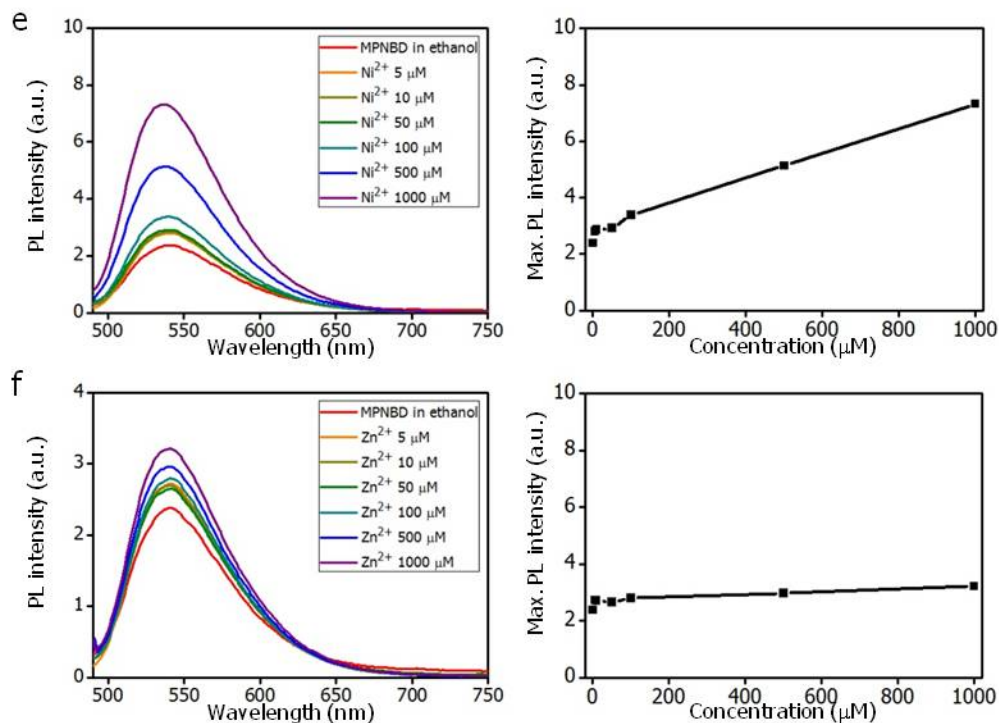

**Figure S8.** Fluorescence responses of MPNBD to  $\text{K}^+$ ,  $\text{Mg}^{2+}$ ,  $\text{Mn}^{2+}$ ,  $\text{Na}^+$ ,  $\text{Ni}^{2+}$ , and  $\text{Zn}^{2+}$ .

Changes of fluorescence spectra and maximum emission intensities of MPNBD upon gradual addition (0 to 1000  $\mu\text{M}$ ) of  $\text{K}^+$ (a),  $\text{Mg}^{2+}$ (b),  $\text{Mn}^{2+}$ (c),  $\text{Na}^+$ (d),  $\text{Ni}^{2+}$ (e), and  $\text{Zn}^{2+}$ (f) in ethanol were examined. The excitation wavelength was 470 nm, and the monitored maximum photoluminescence (PL) emission wavelength was 541 nm. a.u., arbitrary unit.

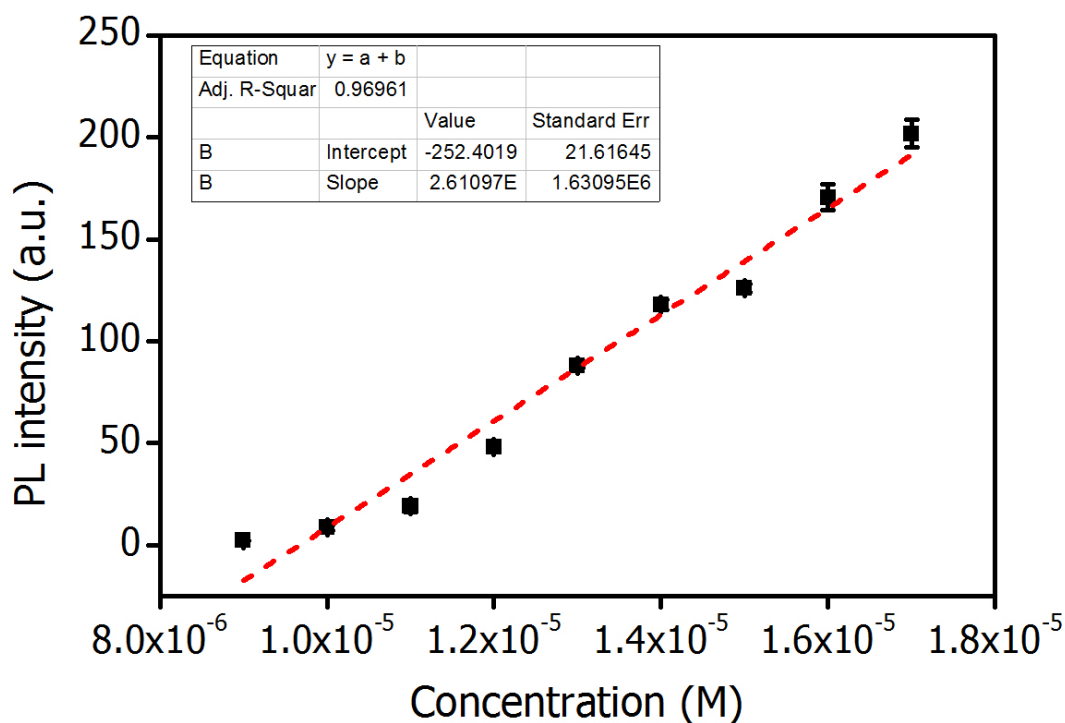

**Figure S9.** Calibration curve of MPNBD-Fe<sup>3+</sup> in ethanol solution.

The excitation wavelength was 470 nm, and the monitored maximum photoluminescence (PL) emission wavelength was 533 nm. The detection limit (DL) of Fe<sup>3+</sup> ions using MPNBD was determined from the following equation:  $DL = K \times SD/S$ , where  $K=3$ ;  $SD$  is the standard deviation of the blank solution;  $S$  is the slope of the calibration curve.  $DL = K \times SD/S = 3 \times 0.07032/2.61 \times 10^7 = 8.08 \times 10^{-6}$  M. The PL intensity was measured 3 times and averaged. Vertical bars indicate the standard error of the mean.

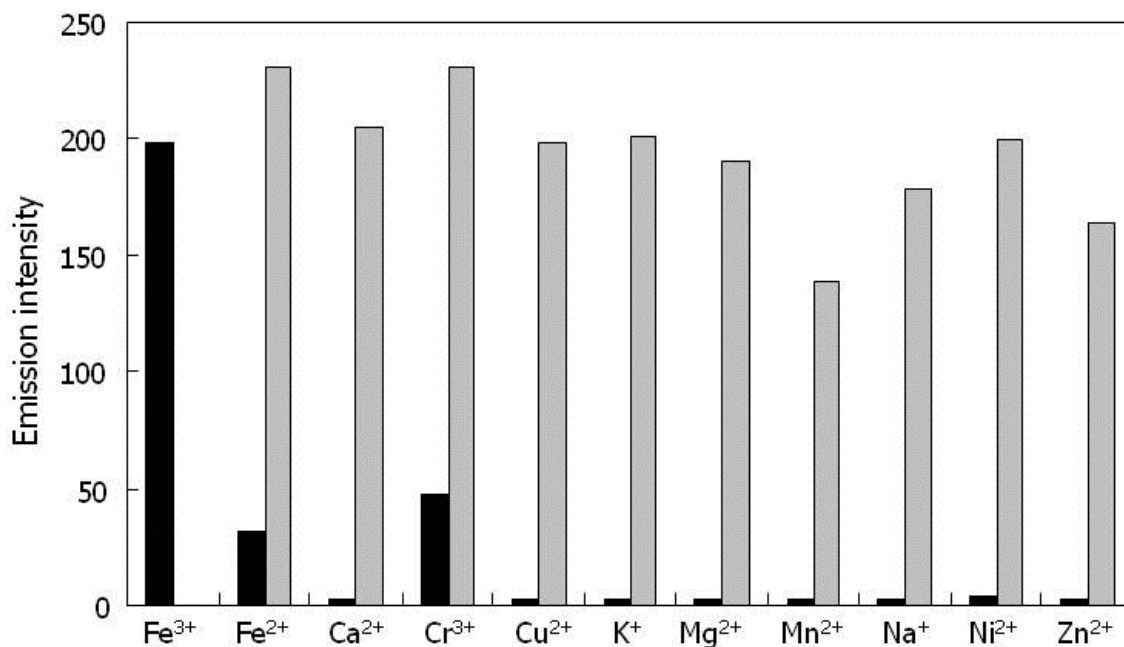

**Figure S10.** Fluorescence response of MPNBD to various metal ions and to mixtures of  $\text{Fe}^{3+}$  and other metal ions.

Fluorescence responses of MPNBD to  $\text{Fe}^{3+}$  (20  $\mu\text{M}$ ) or 20  $\mu\text{M}$  of other metal ions (black bars) and to mixtures of  $\text{Fe}^{3+}$  (20  $\mu\text{M}$ ) and 20  $\mu\text{M}$  of other metal ions (gray bars) in ethanol solution were compared.

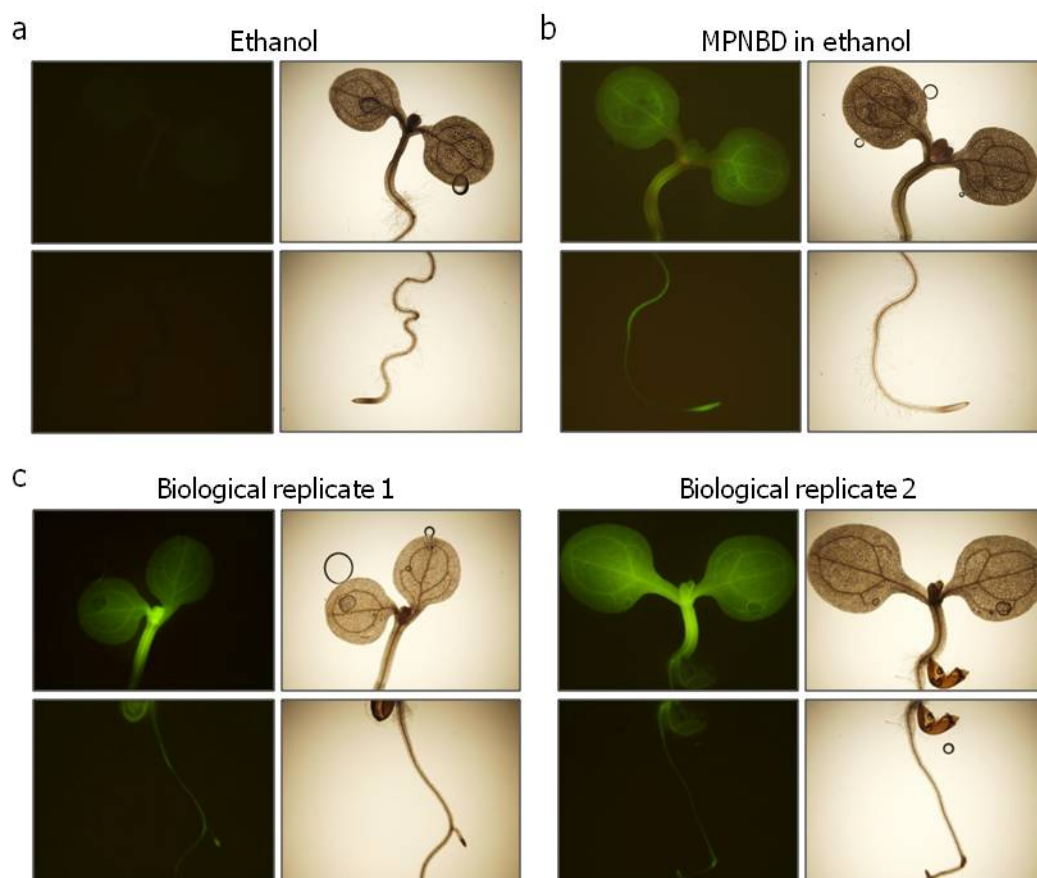

**Figure S11.** Images of MPNBD-treated plants.

Four-day-old whole *Arabidopsis* seedlings grown on  $\frac{1}{2}$  X Murashige & Skoog (MS) media containing 0.6% (w/v) agar (hereafter referred to as MS-agar plates) were treated with either ethanol (a) or 50  $\mu$ M MPNBD in ethanol (b). The seedlings were visualized by optical and fluorescence microscopy. Fluorescence images are shown in the left panels and optical microscope images are shown in the right panels. Note that no fluorescent signals were detected in the ethanol-treated plants. To evaluate the reproducibility of the MPNBD-mediated fluorescent signals in plants, two additional plants (biological replicates 1 and 2) were treated with MPNBD independently under the identical conditions (c).

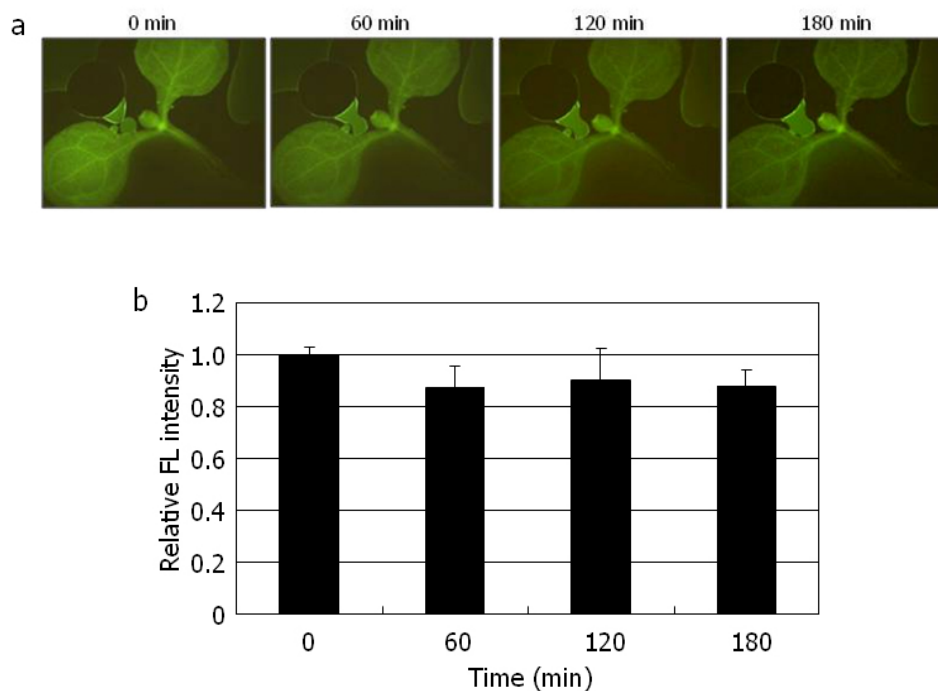

**Figure S12.** Stability of MPNBD fluorescent probe.

Four-day-old whole *Arabidopsis* seedlings grown on MS-agar plates were treated with 50  $\mu$ M MPNBD in ethanol, as described in **Figure S11**. (a) Fluorescence images obtained at the indicated time points after MPNBD treatments. (b) Quantification of the data in (a). The fluorescence (FL) intensity was measured using the ImageJ software (<http://rsbweb.nih.gov/ij/>), as described previously.<sup>2,3</sup> Note that the fluorescent signals do not significantly diminish for up to 3 h.



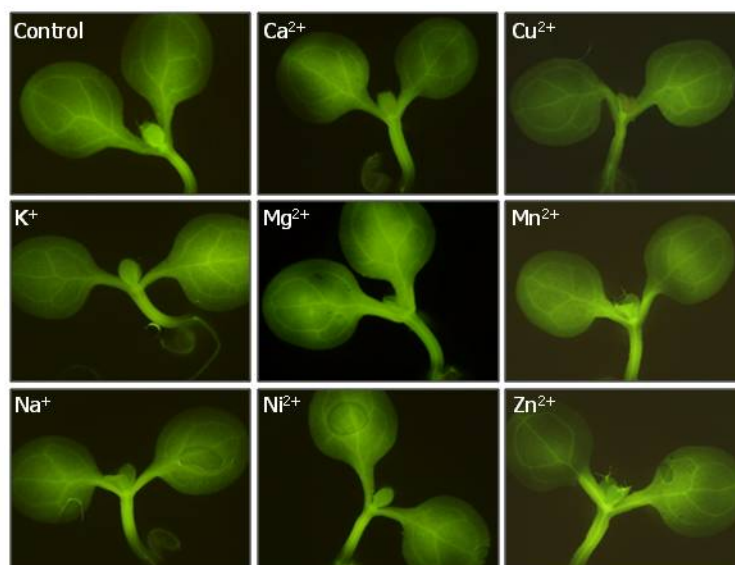

**Figure S13.** Effects of various metal ions on the MPNBD imaging of iron in plants.

Four-day-old whole *Arabidopsis* seedlings grown on MS-agar plates were treated with 500  $\mu\text{M}$  of each metal ion for 12 h and treated with 50  $\mu\text{M}$  MPNBD in ethanol, as described in **Figure S11**. Note that no significant changes in fluorescent signals were detected in the presence of other metal ions.

**Table S1.** Procedures of different iron detection methods in plants.

| <b>Perls</b>                                                                        | <b>Perls/DAB</b>                                                                                                                           | <b>MPNBD</b>                                                |
|-------------------------------------------------------------------------------------|--------------------------------------------------------------------------------------------------------------------------------------------|-------------------------------------------------------------|
| 1. Vacuum infiltration for 15 min in 4% HCl/4% K <sub>4</sub> Fe(CN) <sub>6</sub> . | 1. Vacuum infiltration for 15 min in 4% HCl/4% K <sub>4</sub> Fe(CN) <sub>6</sub> .                                                        | 1. Wash with ethanol.                                       |
| 2. Incubation at room temperature for 30 min.                                       | 2. Incubation at room temperature for 30 min.                                                                                              | 2. Vacuum infiltration for 5 min in 50 µM MBNBD in ethanol. |
| 3. Wash with deionized water.                                                       | 3. Wash with deionized water.                                                                                                              | 3. Incubation at room temperature for 10 min.               |
|                                                                                     | 4. Incubation for 1 h in 0.01M NaN <sub>3</sub> / 0.3% H <sub>2</sub> O <sub>2</sub> in methanol.                                          | 4. Wash with ethanol.                                       |
|                                                                                     | 5. Wash with 0.1 M phosphate buffer (pH 7.4).                                                                                              |                                                             |
|                                                                                     | 6. Incubation for 30 min in 0.025% DAB, 0.005% H <sub>2</sub> O <sub>2</sub> , 0.005% CoCl <sub>2</sub> in 0.1M phosphate buffer (pH 7.4). |                                                             |
|                                                                                     | 7. Wash with deionized water.                                                                                                              |                                                             |
| ~ 1 h                                                                               | ~ 3h                                                                                                                                       | < 20 min                                                    |
| Poor staining in the leaves                                                         | Moderate sensitivity                                                                                                                       | High resolution                                             |
| Low sensitivity                                                                     | (Detection limit : 100 µM)                                                                                                                 | High sensitivity                                            |
| (Detection limit : 375 µM)                                                          | Longer time                                                                                                                                | (Detection limit : 8.08 µM)                                 |
|                                                                                     |                                                                                                                                            | Fast and cheap                                              |
| Ref S4 (Roschztterardt <i>et al.</i> , 2009)                                        | Ref S4 (Roschztterardt <i>et al.</i> , 2009)                                                                                               | This work                                                   |
|                                                                                     | Ref S5 (Meguro <i>et al.</i> , 2007)                                                                                                       |                                                             |

## References

- S1 Y. Xiao and X. Qian, *Tetrahedron Lett.*, 2003, **44**, 2087.
- S2 M.R. Mancuso, R. Davis, S.M. Norberg, S. O'Brien, B. Sennino, T. Nakahara, V.J. Yao, T. Inai, P. Brooks, B. Freimark, D.R. Shalinsky, D.D. Hu-Lowe and D.M. McDonald, *J. Clin. Invest.*, **116**, 2610.
- S3 T. Hirayama, K. Okuda and H. Nagasawa, *Chem. Sci.*, 2013, **4**, 1250.
- S4 H. Roschzttardtz, G. Conéjéro, C. Curie and S. Mari, *Plant Physiol.*, 2009, **151**, 1329.
- S5 R. Meguro, Y. Asano, S. Odagiri, C. Li, H. Iwatsuki and K. Shoumura, *Arch. Histol. Cytol.*, 2007, **70**, 1.
